# Supplementary material for: Selective and Efficient Generation of ortho-Brominated para-Substituted Phenols in ACS-Grade Methanol
Source: Molecules. 2016 Jan 13;21(1):88. doi: 10.3390/molecules21010088 (PMC6274440; doi:10.3390/molecules21010088)
Supplement: Supplementary file 1 [file molecules-21-00088-s001.pdf]

# Supplementary Materials: Selective and Efficient Generation of *ortho*-Brominated *para*-Substituted Phenols in ACS-Grade Methanol

David Georgiev, Bartholomeus W. H. Saes, Heather J. Johnston, Sarah K. Boys, Alan Healy and Alison N. Hulme

| Page  | Contents                                                                                                       |
|-------|----------------------------------------------------------------------------------------------------------------|
| S1–S2 | Figure S1. Choice of wavelength for reaction monitoring.                                                       |
| S2–S4 | Figure S2. $^1\text{H}$ - and $^{13}\text{C}$ -NMR spectra for compounds <b>15</b> and <i>ent</i> - <b>6</b> . |

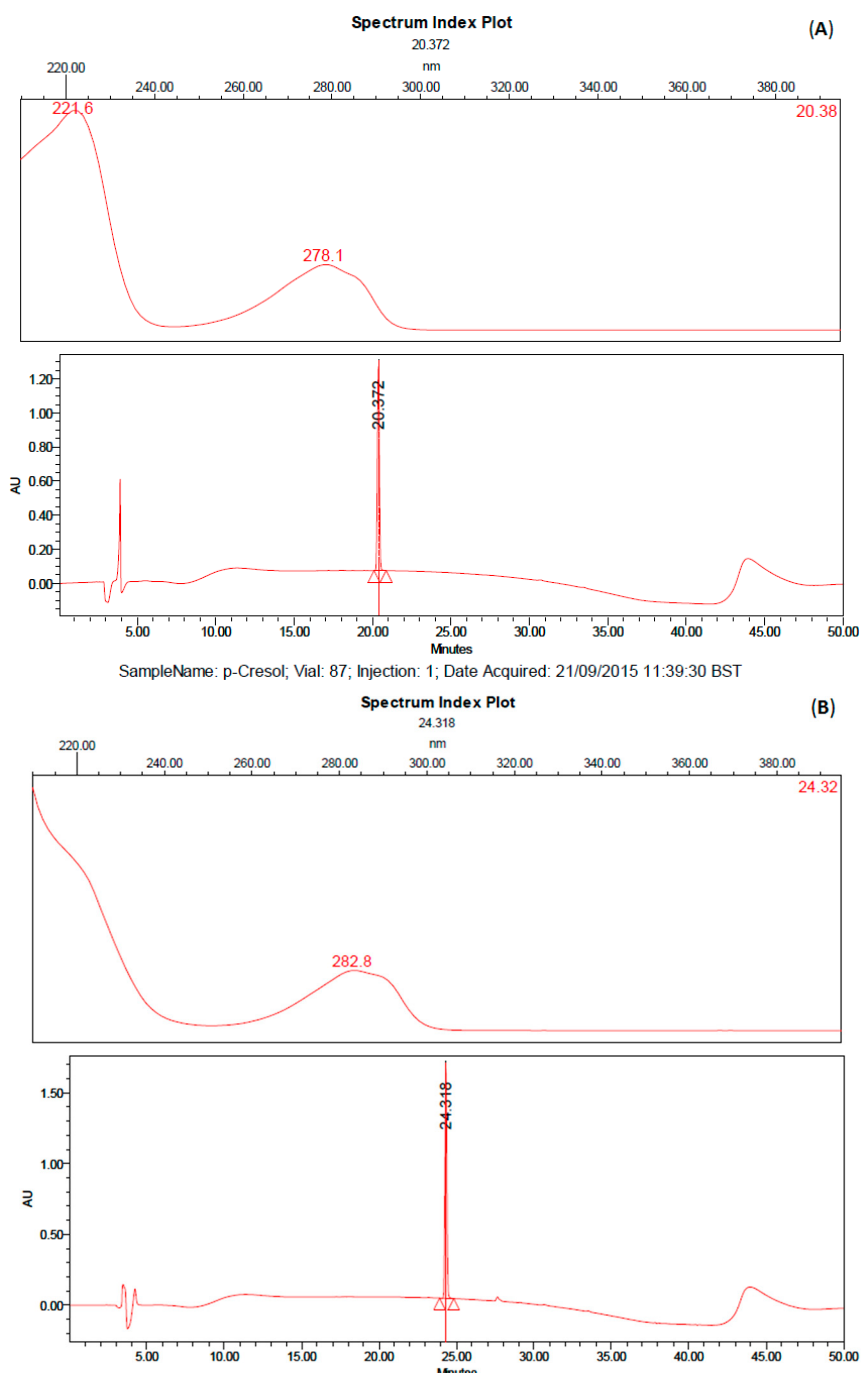

Figure S1. Cont.

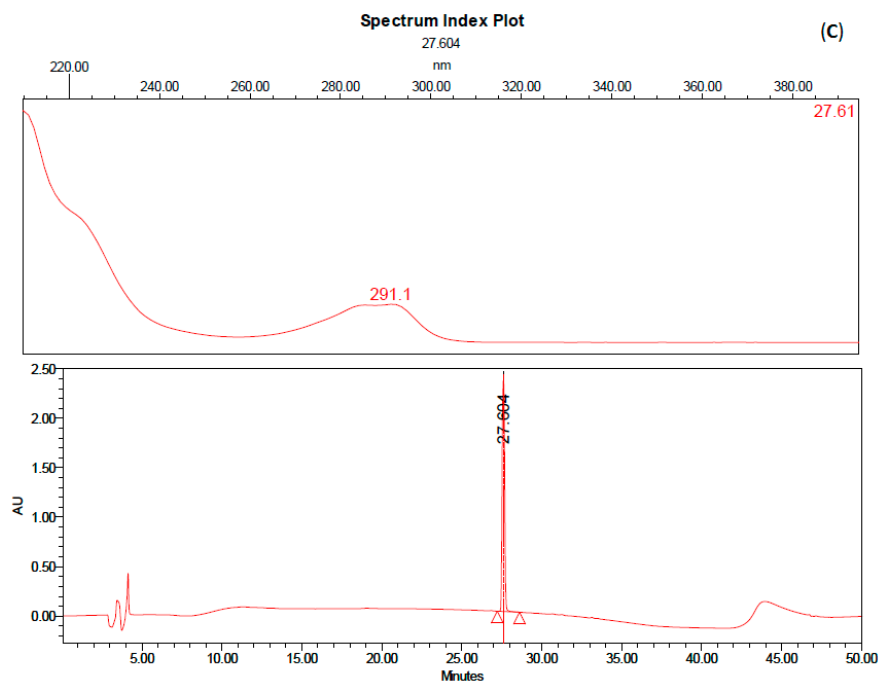

**Figure S1.** Choice of wavelength for reaction monitoring. (A). Chromatograph (lower) and PDA (upper) of *p*-cresol **9** ( $R_t = 20.4$  min,  $\lambda_{\max} = 278$  nm); (B). Chromatograph (lower) and PDA (upper) of 2-bromo-4-methylphenol **10** ( $R_t = 24.3$  min,  $\lambda_{\max} = 283$  nm); (C). Chromatograph (lower) and PDA (upper) of 2,4-dibromo-4-methylphenol **11** ( $R_t = 27.6$  min,  $\lambda_{\max} = 291$  nm).

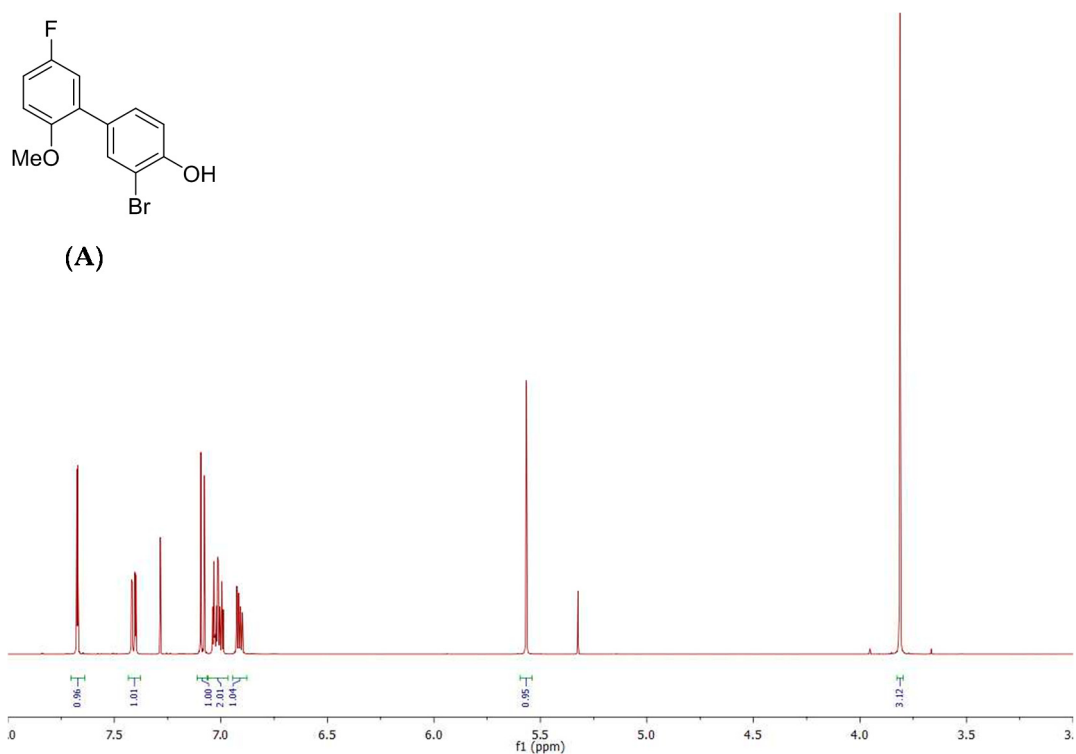

**Figure S2.** *Cont.*

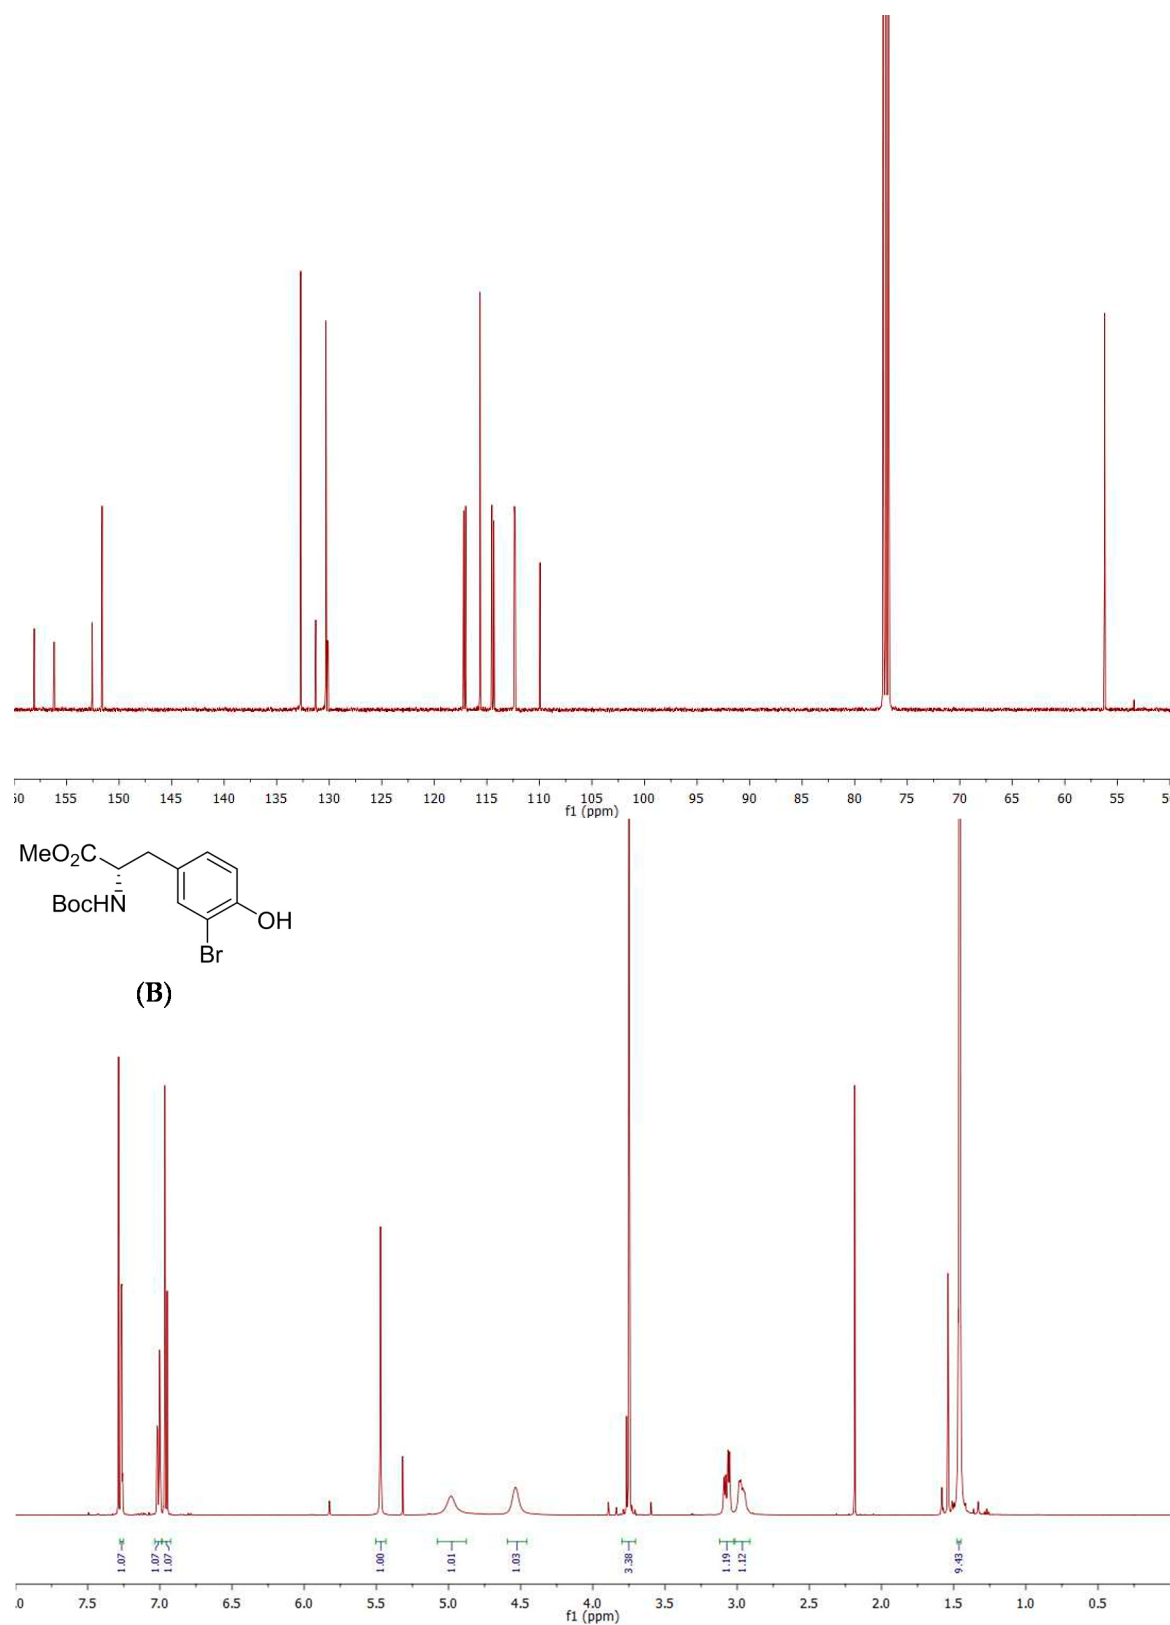

Figure S2. *Cont.*

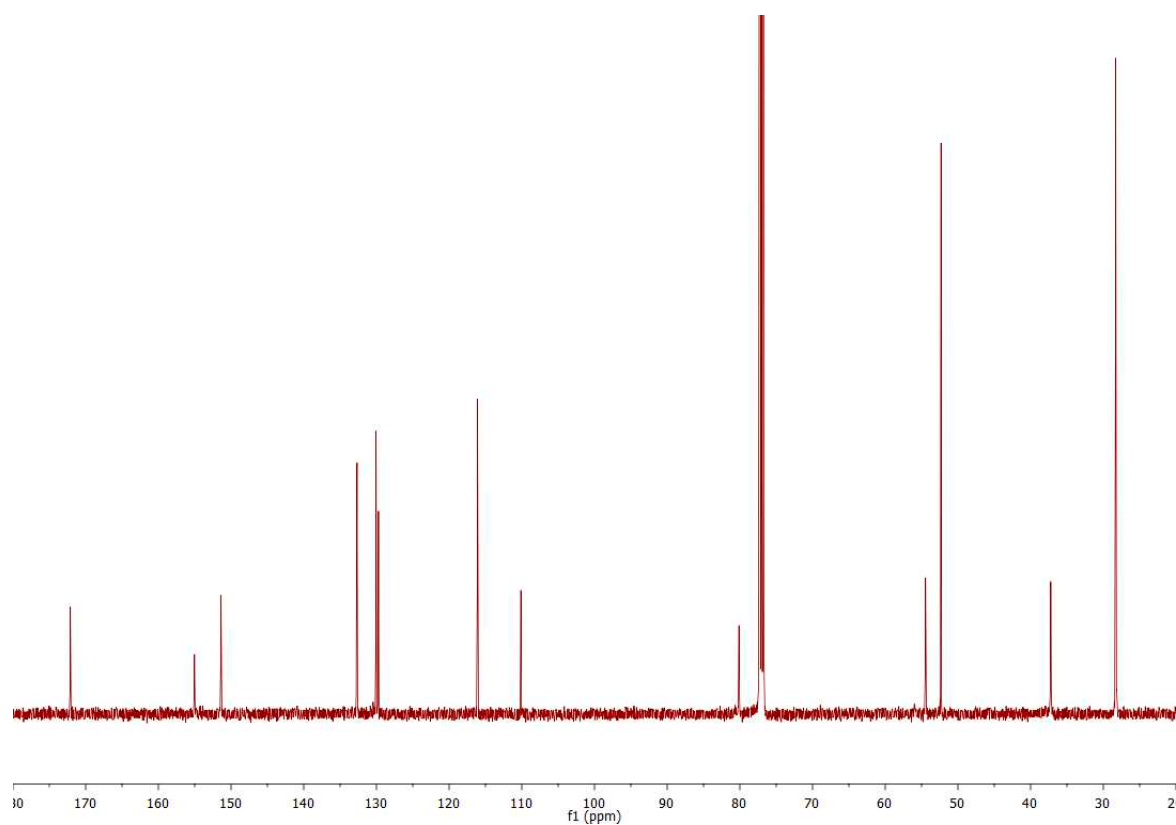

**Figure S2.**  $^1\text{H}$ - and  $^{13}\text{C}$ -NMR spectra for compounds **15** and *ent*-**6**. (A). 3-Bromo-3'-fluoro-6'-methoxy-[1,1'-biphenyl]-4-ol (**15**) ( $\text{CDCl}_3$ ); (B). Methyl (*S*)-2-*tert*-butoxycarbonylamino-3-(3-bromo-4-hydroxyphenyl) propanoate (*ent*-**6**) ( $\text{CDCl}_3$ , 323K).
